# Supplementary material for: The Antiviral Agent Cidofovir Induces DNA Damage and Mitotic Catastrophe in HPV-Positive and -Negative Head and Neck Squamous Cell Carcinomas In Vitro
Source: MDPI journal article supplement (doi:10.3390/cancers11070919), 2019-06-30
Supplement: s1 [file s1]

## Supplementary Materials

# The Antiviral Agent Cidofovir Induces DNA Damage and Mitotic Catastrophe in HPV-Positive and -Negative Head and Neck Squamous Cell Carcinomas In Vitro

Femke Verhees, Dion Legemaate, Imke Demers, Robin Jacobs, Wisse Evert Haakma, Mat Rousch, Bernd Kremer and Ernst-Jan Speel

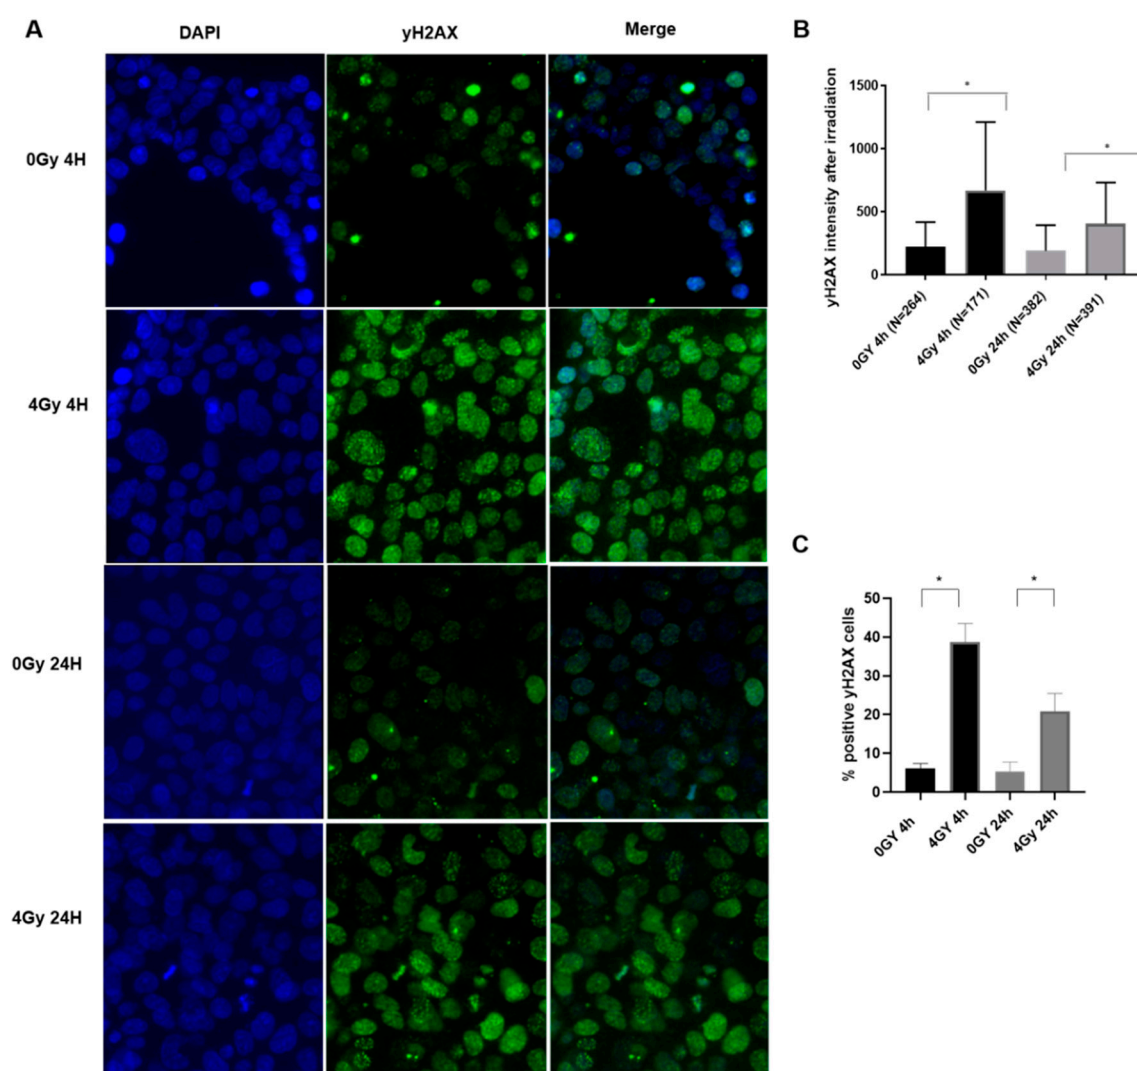

**Figure S1.** (A) The occurrence of DNA-damage in 93-VU-147T treated with 4 Gray irradiation in vitro (magnification  $\times 200$ ). After irradiation, the cells were cultured for 4 and 24 hours and analyzed for immunofluorescence with  $\gamma$ -H2AX. Nuclei are stained with DAPI in blue. DNA double strand breaks (DSBs) are shown by  $\gamma$ -H2AX in green. Nuclei were considered positive if the intensity was higher than the average intensity plus two times standard deviation of the negative control. (B)  $\gamma$ -H2AX intensity and (C) % positive  $\gamma$ H2AX cells were quantified with the Cell Profiler image analysis program.  $N$  = number of analyzed cells. Statistical significance was indicated as follows:  $p < 0.05$  (\*).

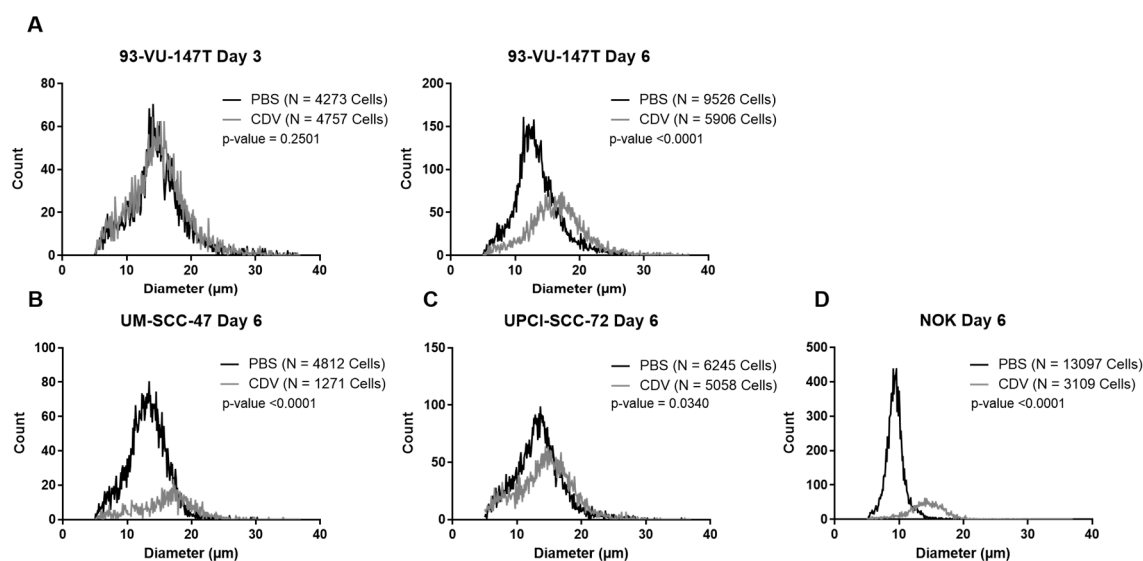

**Figure 2.** Effect of CDV treatment on the cell nucleus diameter. The cells were treated for 3 and 6 days with the IC<sub>50</sub> value of CDV followed by immunofluorescence staining of Cyclin B1 or phospho-Aurora Kinase. After 6 days there is a significant increase in cell nucleus diameter in the different cell lines. Showing the results of (A) 93-VU-147T day 3 and 6 (B) UM-SCC-47 day 6 (C) UPCI-SCC-72 day 6 and (D) NOK day 6. *N* = number of cells analyzed.

**Table S1.** Primary and secondary antibodies used for Western blotting and immunofluorescence.

| Primary Antibody                                                                     | Size (kDa) | Dilution                  | Secondary Antibody                                  | Dilution                  |
|--------------------------------------------------------------------------------------|------------|---------------------------|-----------------------------------------------------|---------------------------|
| Phospho-Histone H2A.X (Ser139). Rabbit mAb. Cell Signaling, Danvers, MA, USA (#9718) | 15         | 1:100 (IF)<br>1:1000 (WB) | Anti-Rabbit IgG, HRP linked. Cell signaling (#7074) | 1:500 (IF)<br>1:1000 (WB) |
| Phospho-BRCA1 (Ser1524) Rabbit mAb. Cell Signaling (#9009)                           | 220        | 1:1000                    | Anti-Rabbit IgG, HRP linked. Cell signaling (#7074) | 1:1000                    |
| Chk1. Mouse mAb. Cell signaling (#2360)                                              | 56         | 1:1000                    | Polyclonal Rabbit Anti-Mouse IG/HRP. Dako Agilent   | 1:1000                    |
| Phospho-Chk1 (Ser345) Rabbit mAb. Cell Signaling (#2348)                             | 56         | 1:1000                    | Anti-Rabbit IgG, HRP linked. Cell signaling (#7074) | 1:1000                    |
| Chk2 Antibody. Rabbit mAb. Cell Signaling. (#2662)                                   | 62         | 1:1000                    | Anti-Rabbit IgG, HRP linked. Cell signaling (#7074) | 1:1000                    |
| Phospho-Chk2 (Thr68) Rabbit mAb. Cell Signaling (#2197)                              | 62         | 1:1000                    | Anti-Rabbit IgG, HRP linked. Cell signaling (#7074) | 1:1000                    |
| Total p53 Mouse mAb. Dako Agilent, Santa Clara, CA, USA (DO-7)                       | 53         | 1:1000                    | Polyclonal Rabbit Anti-Mouse IG/HRP. Dako Agilent   | 1:1000                    |
| Phospho-p53 (Ser15) Rabbit mAb. Cell Signaling (#9284)                               | 53         | 1:1000                    | Anti-Rabbit IgG, HRP linked. Cell signaling (#7074) | 1:1000                    |
| p21 Waf1/ Cip1. Rabbit mAb. Cell signaling (12D1) (#2947)                            | 21         | 1:1000                    | Anti-Rabbit IgG, HRP linked. Cell signaling (#7074) | 1:1000                    |
| Phospho-cdc2 (Tyr15) Rabbit mAb. Cell Signaling (#4539)                              | 34         | 1:1000                    | Anti-Rabbit IgG, HRP linked. Cell signaling (#7074) | 1:1000                    |
| anti-Cyclin B1 antibody. Mouse mAb. Abcam, Cambridge, UK (ab72)                      | 58         | 1:500 (IF)<br>1:1000 (WB) | Polyclonal Rabbit Anti-Mouse IG/HRP. Dako Agilent   | 1:500 (IF)<br>1:2000 (WB) |

|                                                                                                               |          |        |                                                                                   |        |
|---------------------------------------------------------------------------------------------------------------|----------|--------|-----------------------------------------------------------------------------------|--------|
| Phospho-Aurora A (Thr288)/ Aurora B (Thr232)/ Aurora C (Thr198). Rabbit mAb. Cell signalling (D13A11) (#2914) | 35,40,48 | 1:100  | Goat anti Rabbit IgG (H + L), DyLight 488 Conjugated. Thermo Scientific (# 35552) | 1:200  |
| Anti- $\beta$ -actin Clone AC-15. Mouse mAb. Sigma-Aldrich (A1978)                                            | 42       | 1:2000 | Polyclonal Rabbit Anti-Mouse Ig/HRP. Dako Agilent                                 | 1:2000 |

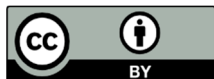

© 2019 by the authors. Licensee MDPI, Basel, Switzerland. This article is an open access article distributed under the terms and conditions of the Creative Commons Attribution (CC BY) license (<http://creativecommons.org/licenses/by/4.0/>).
